# Supplementary material for: Generation of musculoskeletal cells from human urine epithelium-derived presomitic mesoderm cells
Source: PubMed Central journal article supplement (PMC11251367; doi:10.1186/s13578-024-01274-w), 2024-07-15
Supplement: 13578_2024_1274_MOESM1_ESM.pdf [file 13578_2024_1274_MOESM1_ESM.pdf]

Figure S1

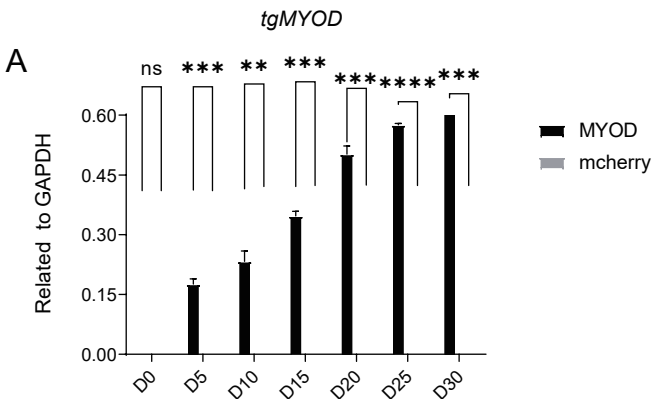

### Figure S1 The expression of ectopic MYOD in UiPSMs

- A.** Representative gene expression of ectopic expressed *MYOD* (*tg MYOD*) during the iMYOD UiPSM cell-derived myogenesis process. Mcherry as a negative control of overexpression vector. Data are mean  $\pm$  SD, n = 3 independent experiments.

Figure S2

A

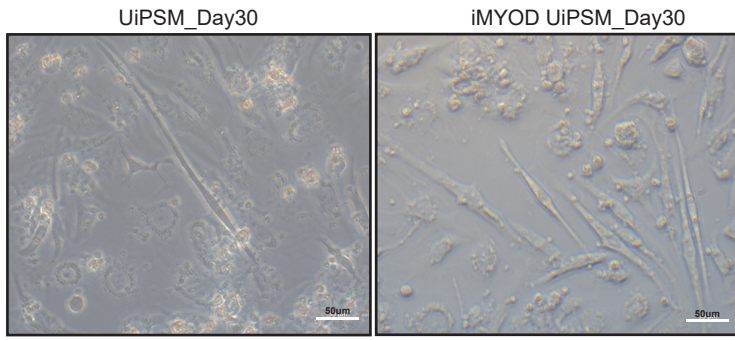

B

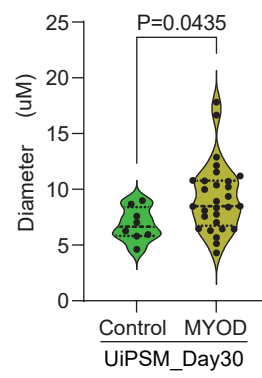

C

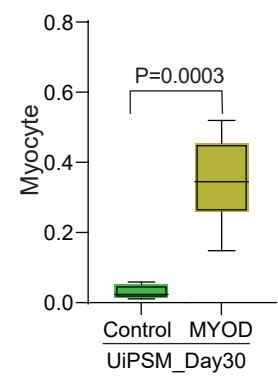

D UiPSM differentiated at day30

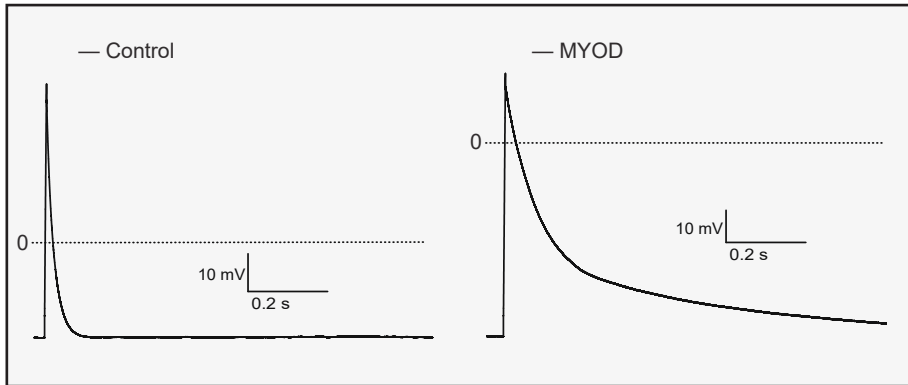

E

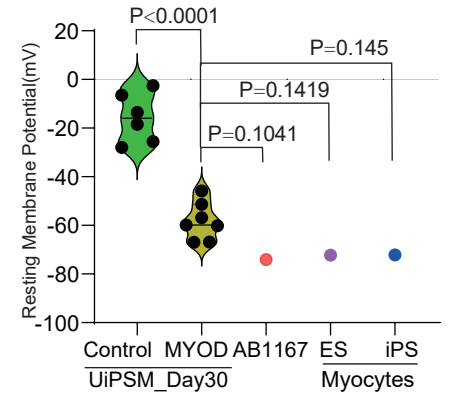

## Figure S2 The expression of ectopic MYOD in UiPSMs

- A. Representative images showed UiPSM and iMYOD differentiated myotubes. Scale bar, 50  $\mu$ m.
- B. Diameter of UiPSM and iMYOD differentiated myotubes. The myotube diameter of UiPSM derived myotubes was lower than MYOD mediated UiPSM derived myotubes.  $n = 3$  independent experiments. (The 3 lines inside the violin plot represent medians and 95% confidence intervals.)
- C. Box plot statistics showed the number of UiPSM and iMYOD differentiated myotubes.  $n = 3$  independent experiments. (The centerline of the box plot represents the mean value)
- D. Membrane excitability in UiPSM and iMYOD differentiated myocytes at day 30. Representative tracing of passive membrane depolarization evoked by a series of step currents (1 Hz by 3 ms) in UiPSM and iMYOD UiPSM-derived myogenic progenitors at day 30.
- E. Violin plot showed the resting membrane potential of UiPSM and iMYOD differentiated myocytes at day 30. Then comparing with reported the means  $\pm$  SE resting membrane potential (RMP) of myotubes within healthy (AB1167)<sup>1</sup> muscle tissue and human ES and iPS derived myocytes<sup>2</sup>.  $n = 3$  independent experiments.

1 Nguyen, C. T., Ebrahimi, M., Gilbert, P. M. & Stewart, B. A. Electrophysiological analysis of healthy and dystrophic 3-D bioengineered skeletal muscle tissues. *American Journal of Physiology-Cell Physiology* **321**, C749-C759, doi:10.1152/ajpcell.00049.2021 (2021).

2 Skoglund, G. *et al.* Physiological and ultrastructural features of human induced pluripotent and embryonic stem cell-derived skeletal myocytes in vitro. *Proceedings of the National Academy of Sciences* **111**, 8275-8280, doi:10.1073/pnas.1322258111 (2014).

Figure S3

A

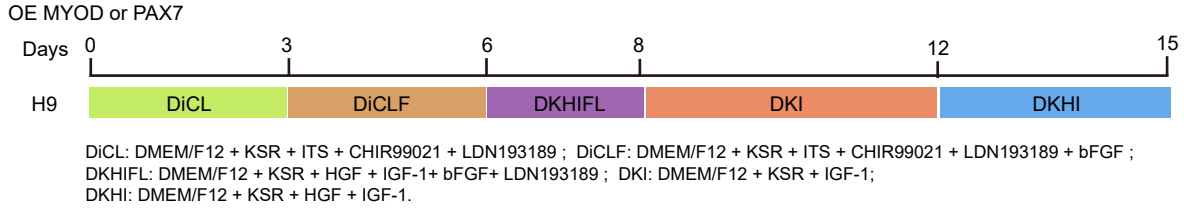

B

OE MYOD:

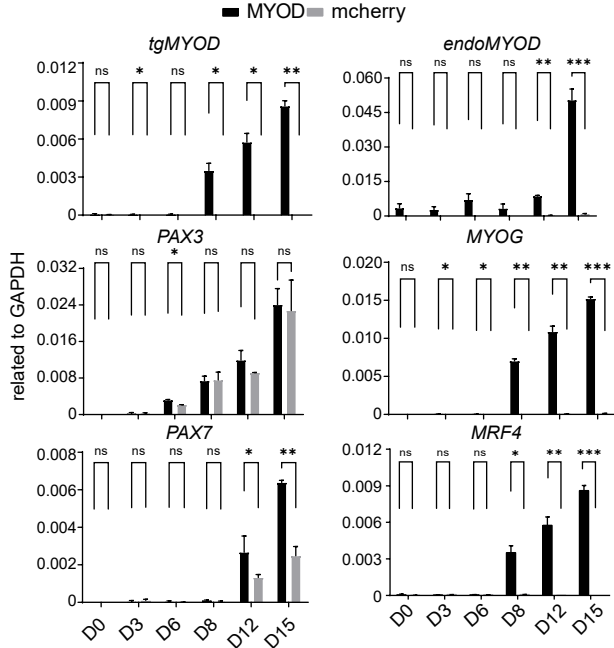

C

OE PAX7:

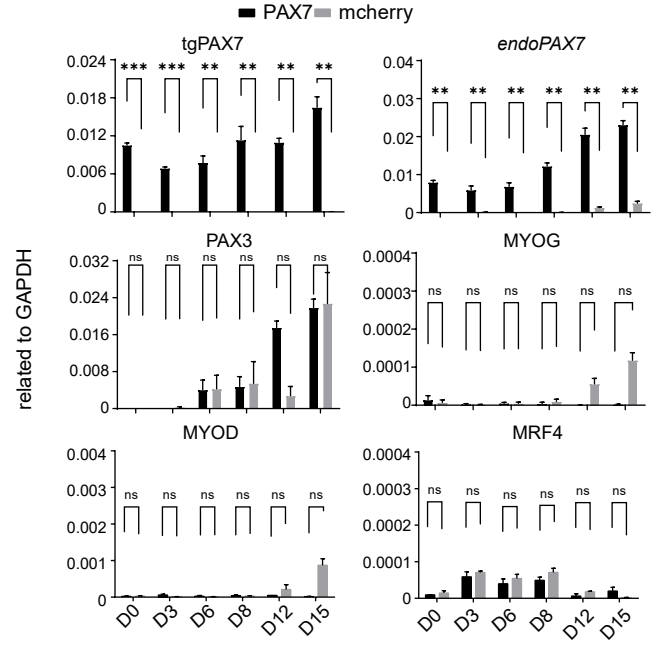

D

OE MYOD

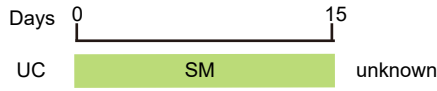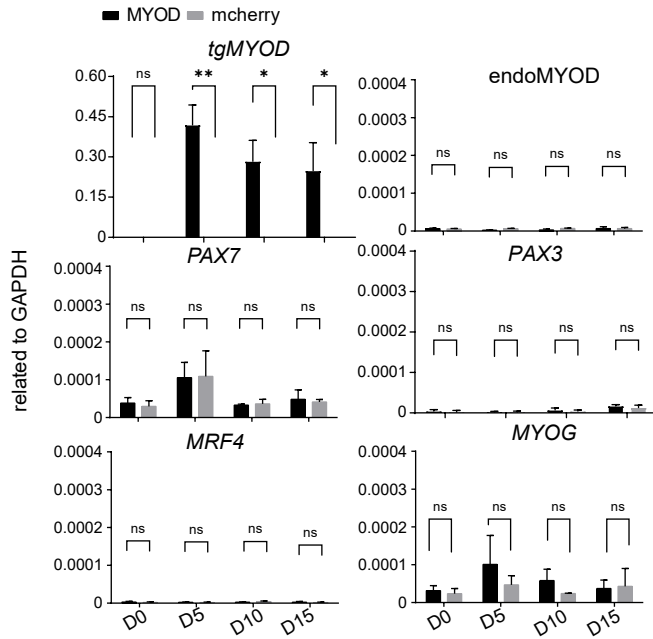

E

OE PAX7

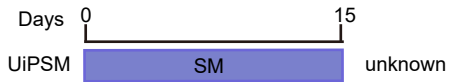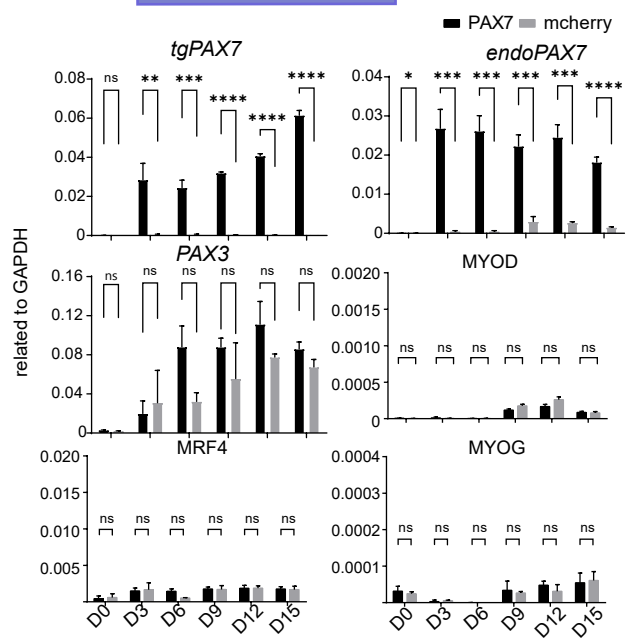

**Figure S3 The ectopic MYOD expressed in hESC(h9) and hUCs and the ectopic PAX7 expressed in hESC(h9) and UiPSMs.**

- A.** Schematic overview of skeletal muscle myocytes differentiated from hESC(H9). This medium is also the base medium for optimizing myogenesis in UiPSM cells referring to Jérôme Chal' paper <sup>3</sup>. The 15-day time window formulated the characteristic genes derived from the transcription factor MYOD-mediated myogenesis of UiPSM cells that had highly expressed in myoblasts.
- B.** The skeletal myocytes differentiated from hESC(H9) for 15 days when overexpressed ectopic *MYOD*. Representative gene expression of human skeletal muscle specific genes, including *endoMYOD*, *tgMYOD*, *PAX3*, *PAX7*, *MYOG*, *MRF4*. Mcherry as a negative control of overexpression vector. Data are mean  $\pm$  SD, n = 3 independent experiments.
- C.** The skeletal myocytes differentiated from hESC(H9) for 15 days when overexpressed ectopic *PAX7*. Representative gene expression of human skeletal muscle specific genes, including *endoPAX7*, *tgPAX7*, *PAX3*, *MYOD*, *MYOG*, *MRF4*. Mcherry as a negative control of overexpression vector. Data are mean  $\pm$  SD, n = 3 independent experiments.
- D.** The skeletal myocytes differentiated from human urine cells (UC) for 15 days when overexpressed *MYOD*. Representative gene expression of human skeletal muscle specific genes, including *endoMYOD*, *tgMYOD*, *PAX3*, *PAX7*, *MYOG*, *MRF4*. Mcherry as a negative control of overexpression vector. Data are mean  $\pm$  SD, n = 3 independent experiments.
- E.** The skeletal myocytes differentiated from UiPSM cells for 15 days when overexpressed ectopic *PAX7*. Representative gene expression of human skeletal muscle specific genes, including *endoPAX7*, *tgPAX7*, *PAX3*, *MYOD*, *MYOG*, *MRF4*. Mcherry as a negative control of overexpression vector. Data are mean  $\pm$  SD, n = 3 independent experiments.

3 Chal, J. *et al.* Generation of human muscle fibers and satellite-like cells from human pluripotent stem cells in vitro. *Nature Protocols* **11**, 1833-1850, doi:10.1038/nprot.2016.110 (2016).

Figure S4

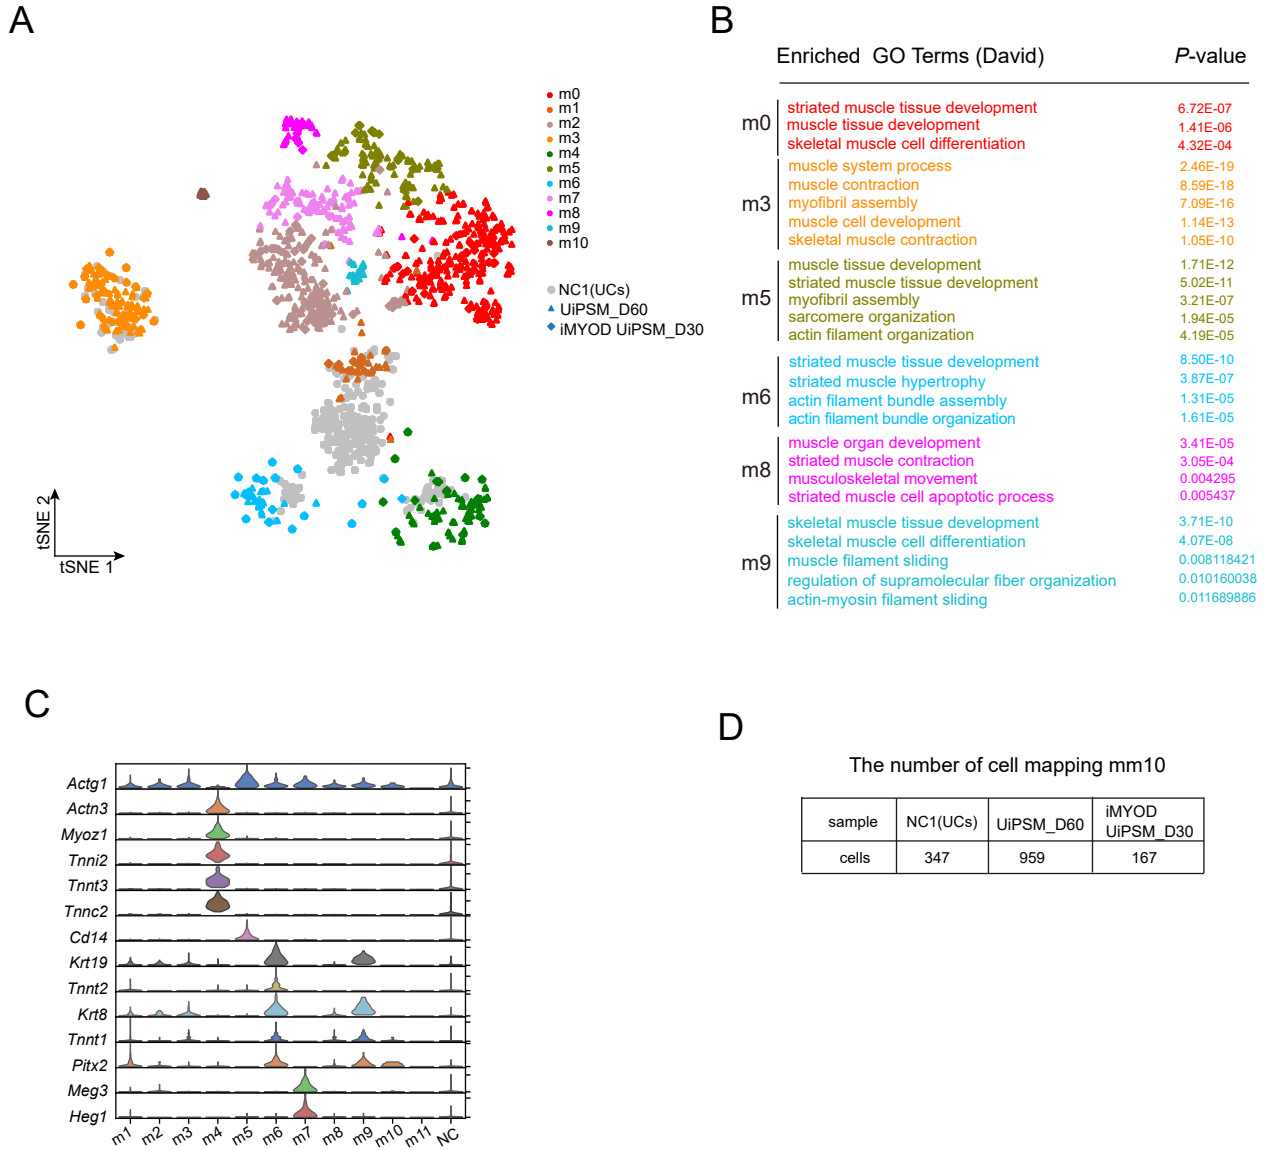

**Figure S4 scRNA-seq analysis of the transplanted TA muscles when mapping mouse genome**

- A.** t-SNE plot showed the projection of 1473 cells mapping to mouse genome(mm10). These cells could be divided in 11 color-coded clusters. The blocks, triangles and diamonds represent the control group (urine cells), and UiPSM and iMYOD UiPSM derived human myocytes, respectively.
- B.** Gene ontology (GO) analysis revealed gene expression profiles of the groups (m0, m3, m5, m6, m8, m9) that are highly associated with skeletal muscle development in the above 11 clusters. p value < 0.05.
- C.** Violin plot showing the expression and ratio of typical genes closed to skeletal muscle development in each cluster.
- D.** The number of cells of the grafts from transplanted UiPSM and iMYOD UiPSM derived human myocytes, mapped to mouse genome(mm10).



Figure S5

A

i. Chondroblast

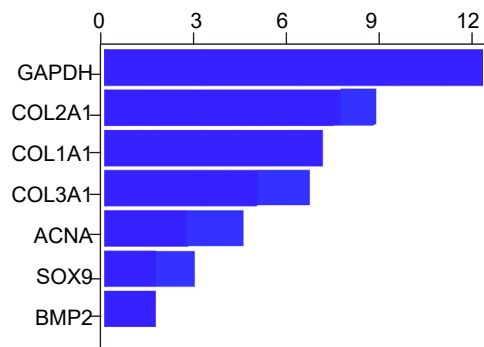

ii. Osteoblast

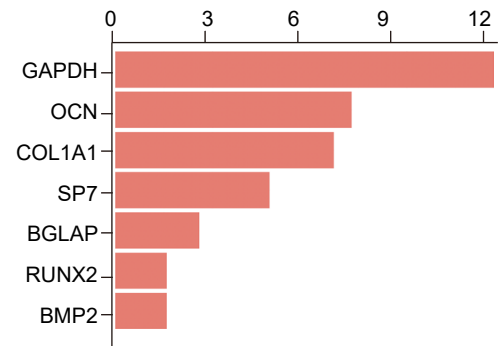

B

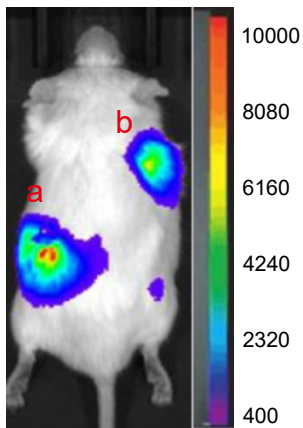

a. Chondroblast

b. Osteoblast

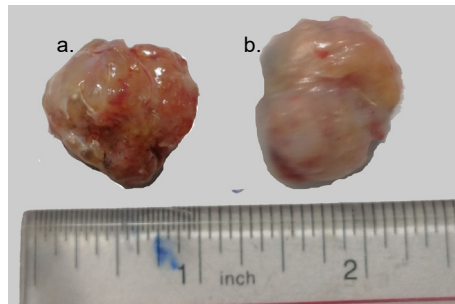

**Figure S5 Transplantation of UiPSM cells-derived chondroblasts and osteoblasts in MITRG mice**

- A.** The expression level of differential expression of representative genes in Chondroblast (i) and Osteoblast (ii), comparing with UiPSM cells. GAPDH as internal reference.
- B.** Luciferase labeled UiPSM cells-derived chondroblasts and osteoblasts were injected subcutaneously into the back of the MITRG mice. In vivo BLI signal in a representative MITRG mouse at days 30 after transplantation (left). Representative photograph of the anatomy of the above grafts (right). UiPSM derived chondroblast transplanted in to the left side of the mouse back (a) and UiPSM derived osteoblast transplanted in to the right side (b).

**Table S1 Antibodies, Chemicals, and Recombinant Proteins; related to Experimental Procedures**

| REAGENT or RESOURCE                                  | SOURCE                    | IDENTIFIER      |
|------------------------------------------------------|---------------------------|-----------------|
| <b>Antibodies</b>                                    |                           |                 |
| Mouse monoclonal anti- Human PAX3                    | R & D systems             | Cat#MAB2457     |
| Mouse monoclonal anti-Human PAX7                     | R & D systems             | Cat#MAB1675     |
| Mouse monoclonal anti-Human MYOD                     | R & D systems             | Cat#MAB5966     |
| Mouse monoclonal anti-Myosin Heavy Chain (MF20, MHC) | R & D systems             | Cat#MAB4470     |
| Mouse monoclonal anti-Human Laminin $\alpha$ 3       | R & D systems             | Cat#MAB2144     |
| Rabbit polyclonal anti-Human Desmin                  | Absin                     | Cat#abs106139   |
| Rabbit polyclonal anti-Human MYOD                    | Cell signaling Technology | Cat#D8G3        |
| Mouse monoclonal anti-Human HuNu(hNA)                | Millipore                 | Cat#MAB1281     |
| <b>Chemicals, and Recombinant Proteins</b>           |                           |                 |
| CHIR99021                                            | Synthesized in GIBH       | N/A             |
| bFGF                                                 | PeptoTech                 | GenPept: P09038 |
| EGF                                                  | R & D systems             | Cat#236-EG      |
| EPZ5676                                              | Selleck Chemicals         | Cat#S7062       |
| A8301                                                | R & D systems             | Cat#2939        |
| SB431542                                             | PeptoTech                 | Cat#301836-41-9 |
| Vitamin C                                            | Sigma-Aldrich             | Cat#49752       |
| Dexamethasone Phosphate disodium (Dex)               | Target Mol                | Cat#T0947L      |
| ITS                                                  | Gibco                     | Cat#41400045    |
| IGF-1                                                | Pepto Tech                | Cat#250-19      |
| HGF                                                  | R & D systems             | Cat#294-HG-250  |
| Bovine Serum Albumin (BSA)                           | Sigma                     | Cat# 9048-46-8  |
| 1-Thioglycerol                                       | Sigma                     | Cat#96-27-5     |
| $\beta$ -Glycerophosphate                            | PeptoTech                 | Cat#154804-51-0 |

**Table S2 Primers for quantitative PCR; related to Experimental Procedures**

| GENE Name         | Forward                     | Reverse                     |
|-------------------|-----------------------------|-----------------------------|
| <i>GAPDH</i>      | <i>GTGGACCTGACCTGCCGTCT</i> | <i>GGAGGAGTGGGTGTCGCTGT</i> |
| <i>Total-MYOD</i> | TGCCACAACGGACGACTT          | GCAGGCCACAGTAGGCA           |
| <i>Endo-MYOD</i>  | TAGCAGGTGTAACCGTAA          | TGGCAAAGCAACTCTTAT          |
| <i>TgMYOD</i>     | GTACAGTGCAGGGGAAAG          | TAGAAGTCGTCCGTTGTG          |
| <i>Total-PAX7</i> | TGTGCCCTCAGGTTTAGT          | GCTTCATCCTCCTCCTCTT         |
| <i>Endo-PAX7</i>  | TGGAGTGTGTTGTTGTTGA         | CCGTCTTCTTCGTCTTCT          |
| <i>TgPAX7</i>     | GTACAGTGCAGGGGAAAG          | GCCATCTCCACTATCTTGT         |
| <i>PAX3</i>       | CTCCACGCTCCGGATAGTTC        | ATCTTGTGGCGGATGTGGTT        |
| <i>MYF5</i>       | AATTTGGGGACGAGTTTGTG        | CATGGTGGTGGACTTCCTCT        |
| <i>MYOG</i>       | GCTGTATGAGACATCCCCTA        | CGACTTCCTTACACACCTTAC       |
| <i>MYH3</i>       | TTGATGCCAAGACGTATTGCT       | GGGGGTTTCATGGCGTACAC        |
| <i>MRF4</i>       | CAACAATCCCTACGACTACGC       | ACGTCAAAGGCACTATCGGTG       |
| <i>MYH7</i>       | GCAGTGTATGAGAGGATGT         | CTCGTTGGTGAAGTTGATG         |
| <i>RUNX2</i>      | CTCACTACCACACCTACC          | TTCATCCATTCTGCCACTA         |
| <i>BGLAP</i>      | AGCGAGGTAGTGAAGAGA          | GATGTGGTCAGCCAACCTC         |
| <i>BMP2</i>       | GTGGAATGACTGGATTGTG         | TGATTAGTGGAGTTCAGATGA       |

|                  |                       |                       |
|------------------|-----------------------|-----------------------|
| <b>SP7</b>       | CAGGCTATGCTAATGATTACC | GGCAGACAGTCAGAAGAG    |
| <b>OCN</b>       | TGGCCCTGAC TGCATTCTGC | GCTGTGCCGTCCATACTTTCG |
| <b>OPN</b>       | CCTCTGAAGAAACGGATGACT | CTGTGTGTTTCCACGCTT    |
| <b>Collagen1</b> | CGAGTATGGAAGCGAAGGTT  | CACAAGCGTGCTGTAGGT    |
| <b>ACAN</b>      | AGGCAGCGTGATCCTTACC   | GGCCTCTCCAGTCTCATTCTC |
| <b>SOX9</b>      | GTACCCGCACTTGACACAAC  | TCTCGCTCTCGTTCAGAAGTC |
| <b>COL2A1</b>    | CGTCCAGATGACCTTCTACG  | TGAGCAGGGCCTTCTTGAG   |
| <b>COL9A1</b>    | TGTAAAACGACGGCCAGT    | CAGGAAACAGCTATGACC    |
